# Supplementary material for: Comparison of qualitative and semiquantitative strain elastography in breast lesions for diagnostic accuracy
Source: Cancer Imaging. 2016 May 26;16:12. doi: 10.1186/s40644-016-0070-8 (PMC4882872; doi:10.1186/s40644-016-0070-8)
Supplement: Additional file 1: — Raw data. (XLSX 35 kb) [file 40644_2016_70_MOESM1_ESM.xlsx]

## Sheet: Data Entry sheet
	Demographics						Presenting Complaints									Past Medical History		Physical Exam						Conventional Ultrasound Findings			Ultrasound Elastography Findings:			Histology Findings:
No.	Form_Number	Date:	Age:	Gender:	Residence :	LMP /F.P	Palpable Mass	Mass Duration	Breast pain	Pain Duration	Nipple retraction	Retraction Duration	Nipple discharge	Discharge Duration	Other Complaints	Hx Breast cancer	Chronic illness	Breast mass	Skin changes	Asymmetry	Nipple discharge	Tenderness	Lymphadenopathy	Mass	Mass size	BI-RADS classification	Strain Score:	Strain ratio	USE_Classification	Biopsy Done	Diagnosis	Histology Classification
1	EL1	2014-07-30	37YRS	FEMALE	NAIROBI	01/07/2014/NOR PLANT	YES	1YR	NO	N/A	NO	N/A	NO	N/A	NO	NO	NIL	YES	NO	NO	NO	NO	NO	YES	2 *1CM	2	2	3.2	BENIGN	YES	FIBROADENOMA	BENIGN
2	EL2	2014-07-30	40YRS	MALE	NAIROBI	N/A	YES	6MONTHS	NO	N/A	NO	N/A	NO	N/A	NO	NO	ON PTB/ART	YES	NO	YES	NO	NO	NO	YES	2*2CM	2	2	1.2	BENIGN	YES	LIPOMA	BENIGN
3	EL3	2014-07-28	50YEARS	FEMALE	NAIROBI	MENOPAUSAL	YES	2YEARS	YES	2YRS	NO	N/A	NO	N/A	NO	NO	NIL	YES	YES	YES	NO	YES	YES	YES	3*4CM	5	5	13.7	MALIGNANT	YES	DUCTAL CARCINOMA	MALIGNANT
4	EL4	2014-07-31	28YRS	FEMALE	NAIROBI	20/07/14/OCP	YES	1MONTH	YES	1MONTH	NO	N/A	NO	N/A	NO	NO	NIL	YES	NO	NO	NO	NO	NO	YES	1.5*1CM	2	2	1.2	BENIGN	YES	FIBROADENOMA	BENIGN
5	EL5	2014-07-31	23YRS	FEMALE	NAIROBI	12/07/14/NIL	YES	6YRS	NO	N/A	NO	N/A	NO	N/A	NO	NO	NIL	YES	NO	NO	NO	NO	NO	YES	2.2*1.4CM	2	3	3	BENIGN	YES	FIBROADENOMA	BENIGN
6	EL6	2014-07-31	22YRS	FEMALE	NAIROBI	26/07/14/NIL	YES	4YRS	NO	N/A	NO	N/A	NO	N/A	NO	NO	NIL	YES	NO	NO	NO	NO	NO	YES	3.3*1.5CM	2	2	2.2	BENIGN	YES	FIBROADENOMA	BENIGN
7	EL7	2014-07-31	63YRS	FEMALE	NAIROBI	MENOPAUSAL	YES	1YR	YES	1YR	NO	N/A	NO	N/A	NO	NO	NIL	YES	YES	YES	NO	NO	YES	YES	1*1.5CM	4	3	9.7	MALIGNANT	YES	DUCTAL CARCINOMA	MALIGNANT
8	EL8	2014-08-04	37YRS	FEMALE	NAIROBI	30/07/14/NORPLANT	YES	1YR	YES	1YR	NO	N/A	NO	N/A	NO	NO	NIL	YES	NO	YES	NO	NO	NO	YES	3.7*2.0CM	2	2	0.7	BENIGN	YES	FIBROADENOMA	BENIGN
9	EL9	2014-08-04	28YRS	FEMALE	NAIROBI	14/07/14/OCP	YES	4MONTHS	NO	N/A	NO	N/A	NO	N/A	NO	NO	NIL	YES	NO	YES	NO	NO	NO	YES	4.6*1.8CM	2	2	2.1	BENIGN	YES	FIBROADENOMA	BENIGN
10	EL10	2014-08-04	22YRS	FEMALE	NAIROBI	LACTATING	YES	1MONTH	YES	1MONTH	NO	N/A	NO	N/A	NO	NO	NIL	YES	YES	YES	NO	YES	YES	YES	2.9*2.1CM	2	3	3.7	BENIGN	YES	SMEAR NOT CONCLUSIVE.FOR REPEAT
11	EL11	2014-08-04	24YRS	FEMALE	NAIROBI	17/07/14/NIL	YES	4YRS	NO	N/A	NO	N/A	NO	N/A	NO	YES-MOTHER	NIL	YES	NO	NO	NO	NO	NO	YES	3.2*1.6CM	2	2	0.7	BENIGN	YES	FIBROADENOMA	BENIGN
12	EL12	2014-08-04	23YRS	FEMALE	NAIROBI	18/07/14/NORPLANT	YES	1YR	NO	N/A	NO	N/A	NO	N/A	NO	NO	NIL	YES	NO	NO	NO	NO	NO	YES	2.3*1.0CM	2	2	2.2	BENIGN	YES	FIBROADENOMA	BENIGN
13	EL13	2014-08-04	24YRS	FEMALE	NAIROBI	05/07/14/OCP	YES	1YR	NO	N/A	NO	N/A	NO	N/A	NO	NO	NIL	YES	NO	NO	NO	NO	NO	YES	2.3*1.4CM	2	2	1.7	BENIGN	YES	FIBROADENOMA	BENIGN
14	EL14	2014-08-05	36YRS	FEMALE	NAIROBI	01/08/14/IUCD	YES	8MONTHS	YES	8MONTHS	NO	N/A	NO	N/A	NO	YES-FATHER	NIL	YES	NO	NO	NO	NO	NO	YES	1.5*0.5CM	2	2	1.9	BENIGN	NO
15	EL15	2014-08-06	37YRS	FEMALE	NAIROBI	26/07/14/NIL	YES	2MONTHS	NO	N/A	NO	N/A	NO	N/A	NO	NO	NIL	YES	NO	NO	NO	NO	NO	YES	1.4*1CM	2	2	2.7	BENIGN	YES	FIBROADENOMA	BENIGN
16	EL16	2014-08-07	18YRS	FEMALE	NAIROBI	15/-7/14/NIL	YES	1YR	NO	N/A	NO	N/A	NO	N/A	NO	YES-GRANDMOTHER	NIL	YES	NO	NO	NO	NO	NO	YES	1.8*1.3CM	2	2	1.7	BENIGN	YES	FIBROADENOMA	BENIGN
17	E17	2014-08-07	21YRS	FEMALE	NAIROBI	13/07/14/NIL	YES	1YR	NO	N/A	NO	N/A	NO	N/A	NO	NO	NIL	YES	NO	NO	NO	NO	NO	YES	2.5*1.7CM	2	2	2.4	BENIGN	YES	FIBROADENOMA	BENIGN
18	EL18	2014-08-07	45YRS	FEMALE	LOITOKTOK	MENOPAUSAL	YES	8MONTHS	YES	8MONTHS	NO	N/A	NO	N/A	NO	NO	NIL	YES	YES	YES	NO	NO	YES	YES	1.5*3.2CM	5	4	7.9	MALIGNANT	YES	DUCTAL CARCINOMA	MALIGNANT
19	EL19	2014-08-07	45YRS	FEMALE	NAIROBI	MENOPAUSAL	YES	1YR	NO	N/A	NO	N/A	NO	N/A	NO	NO	NIL	YES	NO	NO	NO	NO	NO	YES	1*0.5CM	2	2	2.1	BENIGN	YES	FIBROADENOMA	BENIGN
20	EL20	2014-08-11	70YRS	MALE	NAIROBI	N/A	N0	N/A	NO	N/A	NO	N/A	NO	N/A	NO	YES-SISTER	NIL	NO	NO	YES	NO	NO	NO	NO	N/A	1	1	1.4	BENIGN	YES	GYNACOMASTIA	BENIGN
21	EL21	2014-08-11	21YRS	FEMALE	NAIROBI	9/08/14/NIL	YES	7YRS	NO	N/A	NO	N/A	NO	N/A	NO	NO	NIL	YES	NO	NO	NO	NO	NO	YES	1.7*0.90CM	2	2	1.3	BENIGN	YES	FIBROADENOMA	BENIGN
22	EL22	2014-08-11	33YRS	FEMALE	NAIROBI	MISCARIAGE 1WK AGO	YES	3YRS	NO	N/A	NO	N/A	NO	N/A	NO	NO	NIL	YES	NO	NO	NO	NO	NO	YES	3.3*1.25CM	2	2	2.9	BENIGN	YES	FIBROADENOMA	BENIGN
23	EL23	2014-08-11	20YRS	FEMALE	NAIROBI	9/08/14/NIL	YES	7YRS	NO	N/A	NO	N/A	NO	N/A	NO	NO	NIL	YES	NO	NO	NO	NO	NO	YES	3*1.7CM	2	2	2.2	BENIGN	YES	FIBROADENOMA	BENIGN
24	EL24	2014-08-11	20YRS	FEMALE	NAIROBI	9/08/14/NIL	YES	7YRS	NO	N/A	NO	N/A	NO	N/A	NO	NO	NIL	YES	NO	NO	NO	NO	NO	YES	2.6*1.34CM	2	2	2.4	BENIGN	YES	FIBROADENOMA	BENIGN
25	EL25	2014-08-11	23YRS	FEMALE	NAIROBI	2/08/14/NIL	YES	3YRS	NO	N/A	NO	N/A	NO	N/A	NO	NO	NIL	YES	NO	NO	NO	NO	NO	YES	2.2*1.0CM	2	2	1	BENIGN	YES	FIBROADENOMA	BENIGN
26	EL26	2014-08-11	23YRS	FEMALE	NAIROBI	04/08/14/NIL	YES	3YRS	NO	N/A	NO	N/A	NO	N/A	NO	NO	NIL	YES	NO	NO	NO	NO	NO	YES	2.0*05CM	2	2	2.4	BENIGN	YES	FIBROADENOMA	BENIGN
27	EL27	2014-08-11	19YRS	FEMALE	NAIROBI	30/07/14/NIL	YES	1MONTH	YES	1MONTH	NO	N/A	NO	N/A	NO	NO	NIL	YES	NO	NO	NO	NO	NO	YES	3*1.4CM	2	2	2.6	BENIGN	NO
28	EL28	2014-08-13	50YRS	FEMALE	NAIROBI	MENOPAUSAL	YES	1YR	YES	1YR	YES	1YR	NO	N/A	NO	NO	NIL	YES	YES	NO	YES	NO	NO	YES	2.4*1.3CM	5	4	4.9	MALIGNANT	YES	INVASIVE DUCTAL CARCINOMA	MALIGNANT
29	EL29	2014-08-13	47YRS	FEMALE	GATUNDU	05/08/14/NIL	YES	4MONTHS	YES	4MONTHS	NO	N/A	NO	N/A	NO	NO	NIL	YES	YES	NO	NO	NO	NO	YES	2.8*1.5CM	5	5	9.7	MALIGNANT	YES	INVASIVE DUCTAL CARCINOMA	MALIGNANT
30	EL30	2014-08-13	23YRS	FEMALE	NAIROBI	14/07/14/NIL	YES	6MONTHS	NO	N/A	NO	N/A	NO	N/A	NO	NO	NIL	YES	NO	NO	NO	NO	NO	YES	2*0.7CM	2	2	2.5	BENIGN	YES	FIBROADENOMA	BENIGN
31	EL31	2014-08-13	23YRS	FEMALE	NAIROBI	14/07/14/NIL	YES	6MONTHS	NO	N/A	NO	N/A	NO	N/A	NO	NO	NIL	YES	NO	NO	NO	NO	NO	YES	2.5*1CM	2	2	0.5	BENIGN	YES	FIBROADENOMA	BENIGN
32	EL32	2014-08-13	32YRS	FEMALE	NAIROBI	04/08/2014/NIL	YES	1YR	NO	N/A	NO	N/A	NO	N/A	NO	NO	NIL	YES	NO	NO	NO	NO	NO	YES	2.3*1.5CM	2	2	2.5	BENIGN	YES	FIBROADENOMA	BENIGN
33	EL33	2014-08-13	25YRS	FEMALE	NAIROBI	31/07/14/NIL	YES	2MONTHS	NO	N/A	NO	N/A	NO	N/A	NO	NO	NIL	YES	NO	NO	NO	NO	NO	YES	1.2*0.7CM	2	2	2.3	BENIGN	YES	FIBROADENOMA	BENIGN
34	EL34	2014-08-13	20YRS	FEMALE	NAIROBI	10/08/14/NIL	YES	6MONTHS	NO	N/A	NO	N/A	NO	N/A	NO	NO	NIL	YES	NO	NO	NO	NO	NO	YES	2.0*1.1CM	2	2	1.8	BENIGN	YES	FIBROADENOMA	BENIGN
35	EL35	2014-08-13	16YRS	FEMALE	NAIROBI	14/07/2014/NIL	YES	1YR	NO	N/A	NO	N/A	NO	N/A	NO	NO	NIL	YES	NO	NO	NO	NO	NO	YES	1.9*0.8CM	2	2	2.5	BENIGN	YES	FIBROADENOMA	BENIGN
36	EL36	2014-08-14	43YRS	FEMALE	KIRINYAGA	NONE AFTER CHEMOTHERAPY	YES	1MONTH	YES	1MONTH	NO	N/A	NO	N/A	NO	YES	HAD LEFT BREAST MASTECTOMY	YES	YES-SCAR	YES	NO	NO	YES	YES	1.4*0.9CM	5	4	8.8	MALIGNANT	YES	BENIGN BREAST LESION	BENIGN
37	EL37	2014-08-14	20YRS	FEMALE	NAIROBI	12/08/14/NIL	YES	5YRS	NO	N/A	NO	N/A	NO	N/A	NO	NO	NIL	YES	NO	NO	NO	NO	NO	YES	3.2*1.1CM	2	2	2.1	BENIGN	YES	FIBROADENOMA	BENIGN
38	EL38	2014-08-14	22YRS	FEMALE	NAIROBI	01/08/14/NIL	YES	5MONTHS	YES	4MONTHS	NO	N/A	NO	N/A	NO	NO	NIL	YES	NO	NO	NO	NO	NO	YES	4.9*2.4CM	3	3	1	BENIGN	YES	FIBROADENOMA	BENIGN
39	EL39	2014-08-14	22YRS	FEMALE	NAIROBI	04/08/14/NIL	YES	4MONTHS	NO	N/A	NO	N/A	NO	N/A	NO	NO	NIL	YES	NO	NO	NO	NO	NO	YES	1.5*0.8CM	2	2	0.5	BENIGN	YES	FIBROADENOMA	BENIGN
40	EL40	2014-08-14	16YRS	FEMALE	NAIROBI	08/08/14/NIL	YES	1YR	NO	N/A	NO	N/A	NO	N/A	NO	NO	NIL	YES	NO	NO	NO	NO	NO	YES	1.7*1.4CM	2	2	1.5	BENIGN	YES	FIBROADENOMA	BENIGN
41	EL41	2014-08-18	16YRS	FEMALE	NAIROBI	08/08/14/NIL	YES	1YR	NO	N/A	NO	N/A	NO	N/A	NO	NO	NIL	YES	NO	NO	NO	NO	NO	YES	2.6*2.4CM	2	2	0.7	BENIGN	YES	FIBROADENOMA	BENIGN
42	EL42	2014-08-18	47YRS	MALE	NAIROBI	N/A	YES	2MONTHS	YES	2MONTHS	NO	N/A	NO	N/A	NO	NO	NIL	YES	NO	YES	NO	NO	NO	YES	2.5*0.5CM	2	1	1	BENIGN	YES	GYNACOMASTIA	BENIGN
43	EL43	2014-08-18	25YRS	FEMALE	NAIROBI	17/08/14/NIL	YES	3MONTHS	NO	N/A	NO	N/A	NO	N/A	NO	NO	NIL	YES	NO	NO	NO	NO	NO	YES	0.7*0.4CM	2	2	0.6	BENIGN	YES	FIBROADENOMA	BENIGN
44	EL44	2014-08-18	25YRS	FEMALE	NAIROBI	17/08/14/NIL	YES	3MONTHS	NO	N/A	NO	N/A	NO	N/A	NO	NO	NIL	YES	NO	NO	NO	NO	NO	YES	1.9*0.6CM	2	2	1.4	BENIGN	YES	FIBROADENOMA	BENIGN
45	EL45	2014-08-18	25YRS	FEMALE	NAIROBI	15/08/14/NIL	YES	4MONTHS	NO	N/A	NO	N/A	NO	N/A	NO	NO	NIL	YES	NO	NO	NO	NO	NO	YES	7*4.5CM	3	2	1.7	BENIGN	YES	FIBROADENOMA	BENIGN
46	EL46	2014-08-18	20YRS	FEMALE	NAIROBI	10/08/14/NIL	YES	3MONTHS	NO	N/A	NO	N/A	NO	N/A	NO	NO	NIL	YES	NO	NO	NO	NO	NO	YES	2*1.6CM	2	2	1	BENIGN	YES	FIBROADENOMA	BENIGN
47	EL47	2014-08-18	60YRS	FEMALE	KIAMBU	MENOPAUSAL	YES	3YRS	YES	3YRS	NO	N/A	NO	N/A	NO	NO	NIL	YES	YES	YES	NO	NO	NO	YES	3.5*1.8CM	5	3	5.4	MALIGNANT	YES	DUCTAL CARCINOMA	MALIGNANT
48	EL48	2014-08-19	37YRS	FEMALE	NYANDARUA	27/07/14/IUCD	YES	2MONTHS	NO	N/A	NO	N/A	NO	N/A	NO	NO	NIL	YES	NO	NO	NO	NO	NO	YES	1.0*0.2CM	2	2	0.9	BENIGN	YES	DUCTAL PAPILLOMA	BENIGN
49	EL49	2014-08-19	35YRS	FEMALE	NAIROBI	30/07/14/NIL	YES	4MONTHS	NO	N/A	NO	N/A	NO	N/A	NO	NO	NIL	YES	NO	NO	NO	NO	NO	YES	.8*.5CM	2	2	2.3	BENIGN	YES	DUCTAL PAPILLOMA	BENIGN
50	EL50	2014-08-19	37YRS	FEMALE	NAIROBI	25/07/14/NIL	YES	2MONTHS	NO	N/A	NO	N/A	NO	N/A	NO	NO	NIL	YES	NO	NO	NO	NO	NO	YES	1.1*0.6CM	2	2	0.6	BENIGN	YES	FIBROADENOMA	BENIGN
51	EL51	2014-08-20	44YRS	FEMALE	LIMURU	25/07/14/OCP	YES	1MONTH	NO	N/A	NO	N/A	NO	N/A	NO	NO	NIL	YES	NO	NO	NO	NO	NO	YES	1.3*1.9CM	5	5	4.2	MALIGNANT	YES	DUCTAL CARCINOMA	MALIGNANT
52	EL52	2014-08-20	65YRS	FEMALE	KISII	MENOPAUSAL	YES	4MONTHS	YES	4MONTHS	YES	4MONTHS	NO	N/A	NO	NO	NIL	YES	YES	YES	NO	NO	YES	YES	4.1*5.17CM	5	5	6.9	MALIGNANT	YES	DUCTAL CARCINOMA	MALIGNANT
53	EL53	2014-08-21	26YRS	FEMALE	NAIROBI	4MONTHS PG	YES	1YR	NO	N/A	NO	N/A	NO	N/A	NO	NO	NIL	YES	NO	NO	NO	NO	NO	YES	2*0.8CM	2	2	1.6	BENIGN	YES	FIBROADENOMA	BENIGN
54	EL54	2014-08-21	40YRS	MALE	NAIROBI	N/A	YES	1MONTH	NO	N/A	NO	N/A	NO	N/A	NO	NO	ANTI TB/ARV	YES	NO	NO	NO	NO	NO	YES	2.0*1.4CM	2	2	1.8	BENIGN	YES	LIPOMA	BENIGN
55	EL55	2014-08-26	64YRS	FEMALE	KARATINA	MENOPAUSAL	YES	15YRS	NO	N/A	NO	N/A	NO	N/A	NO	NO	NIL	YES	NO	NO	NO	NO	NO	YES	2.8*1.5CM	2	2	1.5	BENIGN	YES	FIBROADENOMA	BENIGN
56	EL56	2014-08-27	47YRS	FEMALE	NYERI	JUNE2014/NIL	YES	10YRS	NO	N/A	NO	N/A	NO	N/A	NO	NO	NIL	YES	NO	NO	NO	NO	NO	YES	1*0.5CM	2	2	0.3	BENIGN	YES	FIBROADENOMA	BENIGN
57	EL57	2014-08-27	27YRS	FEMALE	NAIROBI	25/07/14/NIL	YES	4YRS	NO	N/A	NO	N/A	NO	N/A	NO	NO	NIL	YES	NO	NO	NO	NO	NO	YES	1*0.8CM	2	2	2.6	BENIGN	YES	FIBROADENOMA	BENIGN
58	EL58	2014-08-27	15YRS	FEMALE	NAIROBI	20/08/14/NIL	YES	3MONTHS	NO	N/A	NO	N/A	NO	N/A	NO	NO	NIL	YES	NO	NO	NO	NO	NO	YES	2*1.2CM	2	2	1.7	BENIGN	YES	FIBROADENOMA	BENIGN
59	EL59	2014-08-27	16YRS	FEMALE	NAIROBI	24/08/14/NIL	YES	3MONTHS	NO	N/A	NO	N/A	NO	N/A	NO	NO	NIL	YES	NO	NO	NO	NO	NO	YES	2*1.5CM	2	2	0.8	BENIGN	YES	FIBROADENOMA	BENIGN
60	EL60	2014-08-28	49YRS	FEMALE	MERU	MENOPAUSAL	YES	2MONTHS	NO	N/A	NO	N/A	NO	N/A	NO	NO	MASTECTOMY DONE 10MONTHS AGO	YES	YES	NO	NO	NO	NO	YES	2*1.76CM	5	5	5.8	MALIGNANT	YES	METASTATIC DUCTAL CARCINOMA	MALIGNANT
61	EL61	2014-09-04	28YRS	FEMALE	NAIROBI	25/08/14/NORPLANT	YES	3MONTHS	NO	N/A	NO	N/A	NO	N/A	NO	NO	NIL	YES	NO	NO	NO	NO	YES	YES	0.6*0.8CM	4C	4	8.6	MALIGNANT	YES	DUCTAL CARCINOMA	MALIGNANT
62	EL62	2014-09-04	27YRS	FEMALE	NAIROBI	25/08/14/NIL	YES	6YRS	NO	N/A	NO	N/A	NO	N/A	NO	NO	NIL	YES	NO	NO	NO	NO	NO	YES	1.2*0.73CM	2	2	2.9	BENIGN	YES	FIBROADENOMA	BENIGN
63	EL63	2014-09-04	24YRS	FEMALE	NAIROBI	21/08/14/NIL	YES	1YR	NO	N/A	NO	N/A	NO	N/A	NO	NO	NIL	YES	NO	NO	NO	NO	NO	YES	1.58*0.76CM	2	2	1.1	BENIGN	YES	FIBROADENOMA	BENIGN
64	EL64	2014-09-04	38YRS	FEMALE	NAIROBI	ON DEPO	YES	4MONTHS	NO	N/A	NO	N/A	NO	N/A	NO	NO	NIL	YES	NO	NO	NO	NO	YES	YES	2.6*1.28CM	5	5	7.7	MALIGNANT	YES	DUCTAL CARCINOMA	MALIGNANT
65	EL65	2014-09-04	19YRS	FEMALE	MACHAKOS	MENOPAUSAL	YES	10YRS	NO	N/A	NO	N/A	NO	N/A	NO	NO	NIL	YES	NO	NO	NO	NO	NO	YES	2.2*1.5CM	2	2	2.6	BENIGN	YES	FIBROADENOMA	BENIGN
66	EL66	2014-09-04	38YRS	FEMALE	NAIROBI	26/08/14/NOR PLANT	YES	1YR	YES	1YR	NO	N/A	NO	N/A	NO	NO	NIL	YES	YES	YES	NO	YES	YES	YES	3.2*6CM	4	3	6.1	MALIGNANT	YES	DUCTAL ADENOCARCINOMA	MALIGNANT
67	EL67	2014-09-04	70YRS	FEMALE	KISII	MENOPAUSAL	YES	5MONTHS	YES	5MONTHS	NO	N/A	NO	N/A	NO	NO	MASTECTOMY DONE 2YRS AGO	YES	YES	YES	NO	YES	NO	YES	2.6*1.85CM	5	4	6	MALIGNANT	YES	RECURRENT DUCTAL CARCINOMA	MALIGNANT
68	EL68	2014-09-04	48YRS	FEMALE	KIKUYU	POST CHEMOTHERAPY	YES	1MONTH	YES	1MONTH	NO	N/A	NO	N/A	NO	NO	PARTIAL MASTECTOMY	YES	YES	YES	NO	YES	NO	YES	3.8*2.1CM	5	5	8.8	MALIGNANT	YES	BENIGN BREAST LESION	BENIGN
69	EL69	2014-09-04	25YRS	FEMALE	NAIROBI	LACTATING	YES	1MONTH	YES	1MONTH	NO	N/A	NO	N/A	NO	NO	NIL	YES	YES	YES	NO	YES	NO	YES	2*2CM	2	2	0.8	BENIGN	YES	MASTITIS	BENIGN
70	EL70	2014-09-15	22YRS	FEMALE	NAIROBI	3MONTHS PG	YES	2YRS	NO	N/A	NO	N/A	NO	N/A	NO	NO	NIL	YES	NO	NO	NO	NO	NO	YES	2.5*1.4CM	2	2	1.3	BENIGN	YES	FIBROADENOMA	BENIGN
71	EL71	2014-09-15	25YRS	FEMALE	NAIROBI	ON DEPO	YES	1MONTH	YES	1MONTH	NO	N/A	NO	N/A	NO	NO	NIL	YES	NO	NO	NO	NO	NO	YES	1.8*0.8CM	2	2	1.5	BENIGN	YES	FIBROADENOMA	BENIGN
1900-03-12	EL72	2014-09-18	47YRS	FEMALE	NAIROBI	MENOPAUSAL	YES	5YRS	NO	N/A	NO	N/A	NO	N/A	WOUND	NO	NIL	YES	YES	YES	NO	NO	YES	YES	3*4.5CM	5	5	5.5	MALIGNANT	YES	DUCTAL CARCINOMA	MALIGNANT
73	EL73	2014-09-18	21YRS	FEMALE	NAIROBI	30/08/14/NIL	YES	6MONTHS	NO	N/A	NO	N/A	NO	N/A	NO	NO	NIL	YES	NO	NO	NO	NO	NO	YES	1.8*1.1CM	2	2	0.7	BENIGN	YES	FIBROADENOMA	BENIGN
74	EL74	2014-09-18	16YRS	FEMALE	NAIROBI	28/08/14/NIL	YES	10MONTHS	NO	N/A	NO	N/A	NO	N/A	NO	NO	NIL	YES	NO	NO	NO	NO	NO	YES	3.2*1.7CM	3	3	2.8	BENIGN	YES	FIBROADENOMA	BENIGN
75	EL75	2014-09-18	20YRS	FEMALE	NAIROBI	20/08/14/NIL	YES	6MONTHS	NO	N/A	NO	N/A	NO	N/A	NO	NO	NIL	YES	NO	NO	NO	NO	NO	YES	1.4*1.8CM	2	2	0.2	BENIGN	YES	FIBROADENOMA	BENIGN
76	EL76	2014-09-18	28YRS	FEMALE	NAIROBI	23/08/14/NIL	YES	3MONTHS	NO	N/A	NO	N/A	NO	N/A	NO	NO	NIL	YES	NO	NO	NO	NO	NO	YES	1.8*1CM	4	4	4.2	MALIGNANT	YES	DUCTAL CARCINOMA	MALIGNANT
77	EL77	2014-09-22	50YRS	FEMALE	MIGORI	MENOPAUSAL	YES	4YRS	NO	N/A	NO	N/A	NO	N/A	NO	NO	NIL	YES	NO	NO	NO	NO	NO	YES	1.3*2.9CM	4	5	6.9	MALIGNANT	YES	GRANULOMATOUS MASTITIS	BENIGN
78	EL78	2014-09-22	40YRS	FEMALE	MAKUENI	MENOPAUSAL	YES	2MONTHS	NO	N/A	NO	N/A	NO	N/A	NO	NO	NIL	YES	NO	NO	NO	NO	NO	YES	1.42*1.53CM	5	5	5.8	MALIGNANT	YES	DUCTAL CARCINOMA	MALIGNANT
79	EL79	2014-09-22	60YRS	FEMALE	NAIROBI	MENOPAUSAL	YES	5MONTHS	YES	5MONTHS	NO	N/A	NO	N/A	NO	NO	HYPERTENSION	YES	NO	NO	NO	NO	YES	YES	2.1*2.5CM	5	5	8.4	MALIGNANT	YES	INVASIVE DUCTAL CARCINOMA	MALIGNANT
80	EL80	2014-09-22	40YRS	FEMALE	NYAHURURU	MENOPAUSAL	YES	5MONTHS	NO	N/A	NO	N/A	NO	N/A	NO	NO	MASTECTOMY 2012	YES	NO	NO	NO	NO	YES	YES	4.9*3.9CM	4	4	7.2	MALIGNANT	YES	RECURRENT DUCTAL CARCINOMA	MALIGNANT
81	EL81	2014-09-22	40YRS	FEMALE	MAKUENI	MENOPAUSAL	YES	2MONTHS	NO	N/A	NO	N/A	NO	N/A	NO	NO	NIL	YES	NO	NO	NO	NO	NO	YES	1*0.7CM	4	4	5.9	MALIGNANT	YES	DUCTAL CARCINOMA	MALIGNANT
82	EL82	2014-09-22	19YRS	FEMALE	NAIROBI	29/08/14/NIL	YES	1YR	NO	N/A	NO	N/A	NO	N/A	NO	NO	NIL	YES	NO	NO	NO	NO	NO	YES	2*1.8CM	2	2	1.8	BENIGN	YES	FIBROADENOMA	BENIGN
83	EL83	2014-09-22	20YRS	FEMALE	NAIROBI	19/09/14/NIL	YES	1YR	NO	N/A	NO	N/A	NO	N/A	NO	NO	NIL	YES	NO	NO	NO	NO	NO	YES	1.7*1.1CM	2	2	1.2	BENIGN	YES	FIBROADENOMA	BENIGN
84	EL84	2014-09-22	27YRS	FEMALE	NAIROBI	10/09/14/NIL	YES	6MONTHS	NO	N/A	NO	N/A	NO	N/A	NO	NO	NIL	YES	NO	NO	NO	NO	NO	YES	2.1*1.3CM	3	3	2.8	BENIGN	YES	FIBROADENOMA	BENIGN
85	EL85	2015-01-09	39YRS	FEMALE	NAIROBI	31/12/14/NIL	YES	1YR	YES	3MONTHS	NO	N/A	NO	N/A	NO	YES-COUSIN	NIL	YES	NO	NO	NO	NO	NO	YES	3.2*1.4CM	4	3	7.9	MALIGNANT	YES	DUCTAL CARCINOMA	MALIGNANT
86	EL86	2015-01-09	19YRS	FEMALE	NAIROBI	2/12 PG	YES	1YR	NO	N/A	NO	N/A	NO	N/A	NO	NO	NIL	YES	NO	NO	NO	NO	NO	YES	2.0*1.4CM	2	2	2.5	BENIGN	YES	FIBROADENOMA	BENIGN
87	EL87	2015-01-09	49YRS	FEMALE	MURANGA	MENOPAUSAL	YES	6MONTHS	YES	6MONTHS	NO	N/A	NO	N/A	SKIN CHANGES	NO	NIL	YES	YES	YES	NO	YES	YES	YES	4.4*2.1CM	5	5	8.2	MALIGNANT	YES	DUCTAL CARCINOMA	MALIGNANT
88	EL88	2015-01-09	28YRS	FEMALE	NAIROBI	02/01/2015/NIL	YES	4MONTHS	NO	N/A	NO	N/A	NO	N/A	NO	NO	NIL	YES	NO	NO	NO	NO	NO	YES	2.3*1.2CM	2	2	1.8	BENIGN	YES	FIBROADENOMA	BENIGN
89	EL89	2015-01-12	21YRS	FEMALE	NAIROBI	19/12/2014/NIL	YES	6YRS	NO	N/A	NO	N/A	NO	N/A	NO	NO	NIL	YES	NO	NO	NO	NO	NO	YES	2.3*1.3CM	2	2	1.2	BENIGN	YES	FIBROADENOMA	BENIGN
90	EL90	2015-01-12	22YRS	FEMALE	NAIROBI	27/12/2014/NIL	YES	2MONTHS	NO	N/A	NO	N/A	NO	N/A	NO	NO	NIL	YES	NO	NO	NO	NO	NO	YES	3.2*1.4CM	2	2	2	BENIGN	YES	FIBROADENOMA	BENIGN
91	EL91	2015-01-12	32YRS	FEMALE	NAIROBI	21/12/2014/OCP	YES	4MONTHS	NO	N/A	NO	N/A	NO	N/A	NO	NO	NIL	YES	NO	NO	NO	NO	NO	YES	1.9*1CM	2	2	1.3	BENIGN	YES	FIBROADENOMA	BENIGN
92	EL92	2015-01-12	34YRS	FEMALE	NAIROBI	30/12/2014/NORPLANT	YES	1YR	YES	8MONTHS	YES	6MONTHS	NO	N/A	SKIN CHANGES	NO	NIL	YES	YES	YES	NO	YES	YES	YES	4.3*2.5CM	4	5	9.5	MALIGNANT	YES	DUCTAL CARCINOMA	MALIGNANT
93	EL93	2015-01-12	29YRS	FEMALE	NAIROBI	29/12/2014/NIL	YES	4MONTHS	NO	N/A	N0	N/A	NO	N/A	NO	NO	NIL	YES	NO	NO	NO	NO	NO	YES	3.1*1.2CM	3	3	2.7	BENIGN	YES	FIBROADENOMA	BENIGN
94	EL94	2015-01-12	22YRS	FEMALE	NAIROBI	25/12/2014/OCP	YES	6MONTHS	NO	N/A	NO	N/A	NO	N/A	NO	NO	NIL	YES	NO	NO	NO	NO	NO	YES	2.2*1.4CM	2	2	1.3	BENIGN	YES	FIBROADENOMA	BENIGN
95	EL95	2015-01-12	16YRS	FEMALE	NAIROBI	02/01/2015/NIL	YES	3MONTHS	NO	N/A	NO	N/A	NO	N/A	NO	NO	NIL	YES	NO	NO	NO	NO	NO	YES	3.2*1.1CM	2	2	1.5	BENIGN	YES	FIBROADENOMA	BENIGN
96	EL96	2015-01-19	52YRS	FEMALE	KIAMBU	MENOPAUSAL	YES	3MONTHS	YES	3MONTHS	NO	N/A	NO	N/A	SKIN CHANGES	NO	NIL	YES	YES	NO	NO	YES	NO	YES	5*3CM	5	5	9.3	MALIGNANT	YES	DUCTAL CARCINOMA	MALIGNANT
97	EL97	2015-01-19	29YRS	FEMALE	NAIROBI	04/01/2015/DEPO	YES	6MONTHS	NO	N/A	NO	N/A	NO	N/A	NO	NO	NIL	YES	NO	NO	NO	NO	NO	YES	2.2*1.8CM	2	2	1.8	BENIGN	YES	FIBROADENOMA	BENIGN
98	EL98	2015-01-19	38YRS	FEMALE	NAIROBI	16/01/2015/NIL	YES	8MONTHS	NO	N/A	NO	N/A	NO	N/A	NO	NO	NIL	YES	NO	NO	NO	NO	NO	YES	2*2CM	3	3	2.4	BENIGN	YES	FIBROADENOMA	BENIGN
99	EL99	2015-01-19	28YRS	FEMALE	NAIROBI	06/01/2015/0CP	YES	4MONTHS	NO	N/A	NO	N/A	NO	N/A	NO	NO	NIL	YES	NO	NO	NO	NO	NO	YES	1.2*1CM	2	2	1.7	BENIGN	YES	FIBROADENOMA	BENIGN
100	EL100	2015-01-19	34YRS	FEMALE	NAIROBI	13/01/2015/N	YES	6MONTHS	NO	N/A	NO	N/A	NO	N/A	NO	NO	NIL	YES	NO	NO	NO	NO	NO	YES	2*0.8CM	2	2	1.2	BENIGN	YES	FIBROADENOMA	BENIGN
101	EL101	2015-01-19	22YRS	FEMALE	NAIROBI	04/01/2015/NIL	YES	8MONTHS	NO	N/A	NO	N/A	NO	N/A	NO	YES-GRANDMOTHER	NIL	YES	NO	NO	NO	NO	NO	YES	5*3CM	2	2	2.1	BENIGN	YES	FIBROADENOMA	BENIGN
102	EL102	2015-01-19	52YRS	FEMALE	MACHAKOS	MENOPAUSAL	YES	5MONTHS	YES	4MONTHS	NO	N/A	NO	N/A	SKIN CHANGES	NO	NIL	YES	YES	YES	NO	YES	YES	YES	6*4CM	5	5	8.7	MALIGNANT	YES	DUCTAL CARCINOMA	MALIGNANT
103	EL103	2015-01-19	50YRS	FEMALE	MERU	MENOPAUSAL	YES	1YR	YES	1YR	NO	N/A	NO	N/A	NO	NO	MASTECTOMY 2013	YES	YES	YES	NO	YES	YES	YES	3*2CM	4	4	6.7	MALIGNANT	YES	RECURRENT DUCTAL CARCINOMA	MALIGNANT
104	EL104	2015-01-22	30YRS	FEMALE	NAIROBI	15/01/2015/NIL	YES	3MONTHS	NO	N/A	NO	N/A	NO	N/A	NO	NO	NIL	YES	NO	NO	NO	NO	NO	YES	2*1CM	2	2	2.3	BENIGN	YES	FIBROADENOMA	BENIGN
105	EL105	2015-01-22	39YRS	FEMALE	NAIROBI	10/01/2015/IUCD	YES	6MONTHS	YES	2MONTHS	NO	N/A	NO	N/A	NO	NO	NIL	YES	NO	NO	NO	NO	NO	YES	4*2.9CM	2	3	2.7	BENIGN	YES	FIBROADENOMA	BENIGN
106	EL106	2015-01-22	24YRS	FEMALE	NAIROBI	O7/01/2015/NIL	YES	6MONTHS	NO	N/A	NO	N/A	NO	N/A	NO	NO	NIL	YES	NO	NO	NO	NO	NO	YES	2*1.3CM	2	2	1.8	BENIGN	YES	FIBROADENOMA	BENIGN
107	EL107	2015-01-22	23YRS	FEMALE	NAIROBI	29/12/2015/NIL	YES	2MONTHS	NO	N/A	NO	N/A	NO	N/A	NO	NO	NIL	YES	NO	NO	NO	NO	NO	YES	4*2.3CM	2	2	2.3	BENIGN	YES	FIBROADENOMA	BENIGN
108	EL108	2015-01-22	30YRS	FEMALE	NAIROBI	19/01/2015/OCP	YES	2MONTHS	NO	N/A	NO	N/A	NO	N/A	NO	NO	NIL	YES	NO	NO	NO	NO	NO	YES	3*2.1CM	3	3	1.4	BENIGN	YES	FIBROADENOMA	BENIGN
109	EL109	2015-01-22	26YRS	FEMALE	NAIROBI	2MONTHS PG	YES	6MONTHS	NO	N/A	NO	N/A	NO	N/A	NO	NO	NIL	YES	NO	NO	NO	NO	NO	YES	3.1*1.4CM	2	2	1.7	BENIGN	YES	FIBROADENOMA	BENIGN
110	EL110	2015-01-22	34YRS	FEMALE	NAIROBI	12/01/2015/NIL	YES	2MONTHS	NO	N/A	NO	N/A	NO	N/A	NO	NO	NIL	YES	NO	NO	NO	NO	NO	YES	3.3*2CM	2	2	2.3	BENIGN	YES	FIBROADENOMA	BENIGN
111	EL111	2015-01-26	43YRS	FEMALE	MACHAKOS	ON DEPO	YES	1YR	YES	1YR	YES	5MONTHS	NO	N/A	SKIN CHANGES		NIL	YES	YES	YES	NO	YES	YES	YES	5*3CM	5	5	9.8	MALIGNANT	YES	DUCTAL CARCINOMA	MALIGNANT
112	EL112	2015-01-26	28YRS	FEMALE	NAIROBI	01/01/2015/IUCD	YES	7MONTHS	NO	N/A	NO	N/A	NO	N/A	NO	NO	NIL	YES	NO	NO	NO	NO	NO	YES	2*1.3CM	2	2	2.4	BENIGN	YES	FIBROADENOMA	BENIGN
113	EL113	2015-01-26	37YRS	FEMALE	NAIROBI	13/01/2015/NIL	YES	4MONTHS	YES	1MONTH	NO	N/A	NO	N/A	NO	NO	NIL	YES	NO	NO	NO	NO	NO	YES	4.2*2.8CM	3	3	2.9	BENIGN	YES	FIBROADENOMA	BENIGN
114	EL114	2015-02-05	79YRS	FEMALE	MURANGA	MENOPAUSAL	YES	4MONTHS	YES	2MONTHS	NO	N/A	NO	N/A	SKIN CHANGES	NO	HYPERTENSION	YES	YES	YES	NO	YES	YES	YES	5*3CM	5	5	8.2	MALIGNANT	YES	DUCTAL CARCINOMA	MALIGNANT
115	EL115	2015-02-05	49YRS	FEMALE	NAIROBI	MENOPAUSAL	YES	1YR	NO	N/A	NO	N/A	NO	N/A	NO	NO	NIL	YES	NO	YES	NO	YES	NO	YES	3.3*2.7CM	4	5	6.7	MALIGNANT	YES	DUCTAL CARCINOMA	MALIGNANT

## Sheet: Legend
Variable	Options		Remarks
No.	NUMBER		(CONSECUTIVE BASED AT THE TIME OF ENTRY)
Form Number :	NUMBER
Patient telephone No :			Do not enter, not necessary
Residence :	FREE TEXT		use capital letters
Date:	dd/mm/yyyy
Age:	NUMBER (YEARS)		Age in Years
LMP /F.P			What do you want to get from this? Maybe split it into 2 variables- FP (yes or no) and Ammenorrhoea(yes or No) or exclude it all together
Gender:	FEMALE	MALE	use capital letters
Presenting complaints: (tick appropriately)
Palpable Mass :	YES	NO	use capital letters
duration	Number (months)		duration in months
Breast pain :	YES	NO	use capital letters
duration	Number (months)		duration in months
Skin/Nipple retraction :	YES	NO	use capital letters
duration	Number (months)		duration in months
Nipple discharge :	YES	NO	use capital letters
duration	Number (months)		duration in months
Others : (specify)	TEXT		use capital letters
Past Medical History : (tick appropriately)
Family History of breast cancer	YES	NO	use capital letters
Any other chronic illness:	TEXT		use capital letters
Physical Exam (tick appropriately)
Breast mass	YES	NO	use capital letters
Skin retraction :	YES	NO	use capital letters
Asymmetry:	YES	NO	use capital letters
Nipple discharge :	YES	NO	use capital letters
Tenderness :	YES	NO	use capital letters
Lymphadenopathy :	YES	NO	use capital letters
Conventional Ultrasound Findings:
Mass:	PRESENT	ABSENT	use capital letters
Size	NUMBER (mm)
BI-RADS classification:	Number (0-6)		should be between 0 and 6
Ultrasound Elastography Findings:
Strain Score:	Number (1-5)		should be between 1 and 5
Width ratio :	Number
Strain ratio :	Number
Classification of lesion based on ultrasound elastography findings:	BENIGN	MALIGNANT	use capital letters
Histology Findings:
Biopsy	DONE	NOT DONE	use capital letters
Histological diagnosis	FREE TEXT		use capital letters
Classification of lesion based on histology findings:	BENIGN	MALIGNANT	use capital letters
